# Supplementary material
Source: ML conference proceedings conference paper supplement (https://openreview.net/forum?id=kPfd3pcwHV)
Supplement: supplementary_material [file attachment]

## A Omitted Proofs

We will need the following helper Lemma in the proofs of consistency and robustness.

**Lemma 2.** Recall that  $e_B := (1 + \frac{1}{B})^B$  and  $\alpha_B := B(e_B^{\alpha/B} - 1)$ . We have

$$1. e_B \leq e_{B_a} \text{ and}$$

$$2. \alpha_B \geq \alpha_{B_a}.$$

*Proof.* It is well known that  $e_B$  converges to  $e$  from below for  $B \rightarrow \infty$ . Furthermore, we can show that  $\alpha_B$  is decreasing in  $B$  for all  $\alpha \geq 1$  by taking the derivative

$$\begin{aligned} \frac{\partial}{\partial B} \alpha_B &= \left(1 + \frac{1}{B}\right)^\alpha - 1 - \frac{\alpha}{B} \left(1 + \frac{1}{B}\right)^{\alpha-1} = \left(1 + \frac{1}{B}\right)^{\alpha-1} \left(1 + \frac{1}{B}(1-\alpha)\right) - 1 \\ &\leq \left(1 + \frac{1}{B}\right)^{\alpha-1} \left(1 + \frac{1}{B}\right)^{1-\alpha} - 1 = 0 \end{aligned}$$

where the bound follows from Bernoulli's inequality, which states that  $1 + rx \leq (1+x)^r$  for  $x \geq -1$  and  $r \in \mathbb{R} \setminus (0, 1)$ .  $\square$

### A.1 Proof of Theorem 1 (Robustness)

We write  $P$  and  $D$  to denote the objective value of the primal and dual solutions, i.e.  $P = \sum_a \sum_{t \in S_a} w_{at}$  and  $D = \sum_a B_a \beta_a + \sum_t z_t$  where  $z_t$  is specified in the following proof to ensure feasibility. We can show that after the allocation of each impression  $t$ ,

$$\Delta P \geq \frac{e_B^\alpha - 1}{B e_B^\alpha (e_B^{\alpha/B} - 1)} \Delta D$$

where  $\Delta P$  and  $\Delta D$  are the increase in the primal and dual solution values, respectively. Since we create feasible primal and dual solutions, this is sufficient to bound the robustness due to weak duality. There is one main difference to Feldman et al. (2009a): In their algorithm, setting the dual variable  $z_t$  to  $w_{a(\text{EXP})t} - \beta_a$  ensures dual feasibility as  $a(\text{EXP})$  is the advertiser with maximum discounted gain. However, in order not to violate dual feasibility when following the prediction, we need to increase the dual variables  $z_t$  by a factor of  $\alpha_B$ . Note that for  $\alpha = 1$ , this recovers the competitiveness obtained by Feldman et al. (2009a).

*Proof.* Consider an iteration where we assign an impression  $t$  to advertiser  $a$  and let  $w_1 \leq w_2 \leq \dots \leq w_{B_a}$  be the values of impressions currently allocated to  $a$  in non-decreasing order. Let  $w_0$  be the least valuable of the impressions allocated to  $a$  at the end of iteration  $t-1$ , i.e. the impression that is removed to make space for  $t$ . Assume that after allocating impression  $t$  to  $a$ , it becomes the  $k$ -th least valuable impression allocated to  $a$  with value  $w_{at} = w_k$ . Thus, using that  $w_i \geq w_{i-1}$ , we can bound

$$\begin{aligned} \beta_a^{(t-1)} &= \frac{e_{B_a}^{\alpha/B_a} - 1}{e_{B_a}^\alpha - 1} \left( \sum_{i=0}^{k-1} w_i e_{B_a}^{\alpha(B_a-i-1)/B_a} + \sum_{i=k+1}^{B_a} w_i e_{B_a}^{\alpha(B_a-i)/B_a} \right) \\ &= \frac{e_{B_a}^{\alpha/B_a} - 1}{e_{B_a}^\alpha - 1} \left( \sum_{i=0}^{B_a-1} w_i e_{B_a}^{\alpha(B_a-i-1)/B_a} + \sum_{i=k+1}^{B_a} (w_i - w_{i-1}) e_{B_a}^{\alpha(B_a-i)/B_a} \right) \\ &\geq \frac{e_{B_a}^{\alpha/B_a} - 1}{e_{B_a}^\alpha - 1} \left( \sum_{i=0}^{B_a-1} w_i e_{B_a}^{\alpha(B_a-i-1)/B_a} \right) =: \hat{\beta}_a^{(t-1)} \end{aligned}$$

which is tight when impression  $t$  becomes the most valuable impression assigned to  $a$ . We can now write  $\beta_a^{(t)}$  as a function of the bound  $\hat{\beta}_a^{(t-1)}$ :

$$\beta_a^{(t)} = \frac{e_{B_a}^{\alpha/B_a} - 1}{e_{B_a}^\alpha - 1} \sum_{i=1}^{B_a} w_i e_{B_a}^{\alpha(B_a-i)/B_a}$$

$$\begin{aligned}
&= \frac{e^{\alpha/B_a} - 1}{e_{B_a}^\alpha - 1} \left( \sum_{i=0}^{B_a-1} w_i e_{B_a}^{\alpha(B_a-i)/B_a} + w_{B_a} - w_0 e_{B_a}^\alpha \right) \\
&= \frac{e^{\alpha/B_a} - 1}{e_{B_a}^\alpha - 1} e_{B_a}^{\alpha/B_a} \sum_{i=1}^{B_a} w_{i-1} e_{B_a}^{\alpha(B_a-i)/B_a} + \frac{e^{\alpha/B_a} - 1}{e_{B_a}^\alpha - 1} (w_{B_a} - w_0 e_{B_a}^\alpha) \\
&= e_{B_a}^{\alpha/B_a} \hat{\beta}_a^{(t-1)} + \frac{e^{\alpha/B_a} - 1}{e_{B_a}^\alpha - 1} (w_{B_a} - w_0 e_{B_a}^\alpha).
\end{aligned}$$

448 We set  $z_t := \alpha_B (w_{B_a} - \beta_a^{(t-1)})$  which is feasible as the discounted value  $w_{at} - \beta_a^{(t-1)}$  of the  
449 chosen advertiser  $a$  may only be  $\alpha_B$ -times less the maximum discounted value  $w_{a(\text{EXP})t} - \beta_{a(\text{EXP})}^{(t-1)}$   
450 due to the advantage of the predicted advertiser. This yields a dual increase of

$$\begin{aligned}
\Delta D &= B_a (\beta_a^{(t)} - \beta_a^{(t-1)}) + z_t \\
&= B_a (\beta_a^{(t)} - \beta_a^{(t-1)}) + \alpha_B (w_{B_a} - \beta_a^{(t-1)}) \\
&\leq B_a (\beta_a^{(t)} - \hat{\beta}_a^{(t-1)}) + \alpha_B (w_{B_a} - \hat{\beta}_a^{(t-1)}) \\
&= B_a \left( \left( e_{B_a}^{\alpha/B_a} - 1 \right) \hat{\beta}_a^{(t-1)} + \frac{e_{B_a}^{\alpha/B_a} - 1}{e_{B_a}^\alpha - 1} (w_{B_a} - w_0 e_{B_a}^\alpha) \right) + \alpha_B (w_{B_a} - \hat{\beta}_a^{(t-1)}) \\
&= \alpha_{B_a} \hat{\beta}_a^{(t-1)} + \frac{\alpha_{B_a}}{e_{B_a}^\alpha - 1} (w_{B_a} - w_0 e_{B_a}^\alpha) + \alpha_B (w_{B_a} - \hat{\beta}_a^{(t-1)}) \\
&= \alpha_{B_a} \frac{e_{B_a}^\alpha}{e_{B_a}^\alpha - 1} \underbrace{(\hat{\beta}_a^{(t-1)} - w_0)}_{\geq 0} + \frac{\alpha_{B_a}}{e_{B_a}^\alpha - 1} \underbrace{(w_{B_a} - \hat{\beta}_a^{(t-1)})}_{\geq 0} + \alpha_B (w_{B_a} - \hat{\beta}_a^{(t-1)}) \\
&\leq \alpha_B \frac{e_B^\alpha}{e_B^\alpha - 1} (\hat{\beta}_a^{(t-1)} - w_0) + \frac{\alpha_B}{e_B^\alpha - 1} (w_{B_a} - \hat{\beta}_a^{(t-1)}) + \alpha_B (w_{B_a} - \hat{\beta}_a^{(t-1)}) \\
&= \alpha_B \frac{e_B^\alpha}{e_B^\alpha - 1} (\hat{\beta}_a^{(t-1)} - w_0) + \alpha_B \frac{e_B^\alpha}{e_B^\alpha - 1} (w_{B_a} - \hat{\beta}_a^{(t-1)}) \\
&= \alpha_B \frac{e_B^\alpha}{e_B^\alpha - 1} (w_{B_a} - w_0) = B \frac{e_B^{\alpha/B} - 1}{e_B^\alpha - 1} e_B^\alpha (w_{B_a} - w_0)
\end{aligned}$$

451 where the second inequality is due to  $\alpha_B \geq \alpha_{B_a}$  and  $e_B \leq e_{B_a}$ , as shown in Lemma 2.  $\square$

## 452 A.2 Proof of Theorem 1 (Consistency)

453 In the following, we upper bound PRD using the comparison in Line 7 of Algorithm 1.

454 **Lemma 3.** *We have*

$$\text{PRD} \leq \sum_a \left( (B_a - \ell_a) \beta_a^{(T)} + \frac{1}{\alpha_B} \sum_{t \in \mathbf{X}_a \setminus \mathbf{P}_a} (w_{at} - \beta_a^{(t-1)}) + \sum_{t \in \mathbf{P}_a \cap \mathbf{X}_a} w_{at} \right)$$

455 *Proof.* We first split impressions  $t$  into two categories: Either the algorithm followed the prediction  
456 and assigned  $t$  to  $a^{(t)} = a_{(\text{PRD})}^{(t)}$ , or the algorithm ignored the prediction and assigned  $t$  to  $a^{(t)} =$   
457  $a_{(\text{EXP})}^{(t)} \neq a_{(\text{PRD})}^{(t)}$ . In the latter case, due to the selection rule in Line 7 of Algorithm 1,

$$\alpha_B (w_{a_{(\text{PRD})}^{(t)}} - \beta_{a_{(\text{PRD})}}^{(t-1)}) \leq w_{a_{(\text{EXP})}^{(t)}} - \beta_{a_{(\text{EXP})}}^{(t-1)}.$$

458 In symbols,

$$\text{PRD} = \sum_a \left( \sum_{t \in \mathbf{P}_a \setminus \mathbf{X}_a} w_{at} + \sum_{t \in \mathbf{P}_a \cap \mathbf{X}_a} w_{at} \right)$$

$$\begin{aligned}
&\leq \sum_a \left( \sum_{t \in \mathbf{P}_a \setminus \mathbf{X}_a} \left( \beta_a^{(t-1)} + \frac{1}{\alpha_B} \left( w_{a_{(\text{EXP}),t}^{(t)}} - \beta_{a_{(\text{EXP}),t}^{(t-1)}} \right) \right) \right) + \sum_{t \in \mathbf{P}_a \cap \mathbf{X}_a} w_{at} \Bigg) \\
&= \sum_a \left( \underbrace{\sum_{t \in \mathbf{P}_a \setminus \mathbf{X}_a} \beta_a^{(t-1)}}_{(\dagger)} + \frac{1}{\alpha_B} \sum_{t \in \mathbf{X}_a \setminus \mathbf{P}_a} (w_{at} - \beta_a^{(t-1)}) + \sum_{t \in \mathbf{P}_a \cap \mathbf{X}_a} w_{at} \right)
\end{aligned}$$

where the last equality holds because  $\{\mathbf{P}_a\}_a$  and  $\{\mathbf{X}_a\}_a$  are both partitioning the set of all impressions due to the introduction of the dummy advertiser. For  $(\dagger)$ , we use that  $\beta_a$  can only increase in each round and bound

$$\sum_{t \in \mathbf{P}_a \setminus \mathbf{X}_a} \beta_a^{(t-1)} \leq (B_a - \ell_a) \beta_a^{(T)}.$$

462

□

For the remainder of this section, we consider a fixed advertiser  $a$ . Let us denote with  $t_i$  the  $i$ -th impression allocated to  $a$ . Let

$$(\star) = \frac{1}{\alpha_B} \sum_{t \in \mathbf{X}_a \setminus \mathbf{P}_a} (w_{at} - \beta_a^{(t-1)}) + \sum_{t \in \mathbf{P}_a \cap \mathbf{X}_a} w_{at}$$

as part of the the bound on PRD in Lemma 3.

In order to understand this bound, we make some useful observations in the following lemma to simplify the analysis. The key idea is that we may assume that impressions in  $\mathbf{X}_a$  are ordered to be non-decreasing. In particular, we need to argue that the sum  $\sum_{t \in \mathbf{X}_a \setminus \mathbf{P}_a} \beta_a^{(t-1)}$  can only decrease (as this term is negated in  $(\star)$ ) when impressions in  $\mathbf{X}_a$  are ordered to be non-decreasing: Intuitively, each  $\beta_a^{(t-1)}$  depends only on the  $B_a$  most valuable impressions assigned before impression  $t$ , no matter the order in which  $\mathbf{X}_a^{(t-1)}$  arrived. We can thus minimize each  $\beta_a^{(t-1)}$  if the impressions allocated prior to  $t$  are the impressions of smallest value. To simultaneously minimize each  $\beta_a^{(t)}$  in the sum, we order the impressions in  $\mathbf{X}_a$  to have non-decreasing value. We prove this simplification formally in the following lemma.

**Lemma 4.** *Without loss of generality, we may assume that  $\mathbf{P}_a \cap \mathbf{X}_a$  are the most valuable impressions in  $\mathbf{X}_a$  and that impressions in  $\mathbf{X}_a$  arrive such that their values are non-decreasing.*

*Proof.* We may assume that the impressions in  $\mathbf{P}_a \cap \mathbf{X}_a$  are the most valuable impressions in  $\mathbf{X}_a$ : this can only increase the value of  $\mathbf{P}_a$  but leaves  $\mathbf{S}_a$  unaffected, as  $\mathbf{S}_a$  are by design the  $B_a$  most valuable impressions in  $\mathbf{X}_a$ . All impressions in  $(\star)$  are from  $\mathbf{X}_a$ , so reordering impressions only affects  $(\star)$ . Specifically, we can show that the sum  $\sum_{t \in \mathbf{X}_a \setminus \mathbf{P}_a} \beta_a^{(t-1)}$  in  $(\star)$  is minimized if the values in  $\mathbf{X}_a$  are ordered to be non-decreasing. Assume to the contrary that the  $i$ -th impression added to  $a$  is the last that is in order. That is  $w_{at_1} \leq w_{at_2} \leq \dots \leq w_{at_i}$  and there exists a  $j \leq i$  such that  $w_{at_{j-1}} \leq w_{at_{i+1}} < w_{at_j}$ . Moving  $t_{i+1}$  ahead to its ranked position within the first  $i$  impressions allocated to  $a$  changes the ordering as follows (the first and second row show the impression values before and after changing the position of  $t_{i+1}$ , respectively):

$$\begin{aligned}
w_{at_1} &\leq \dots \leq w_{at_{j-1}} \leq w_{at_j} \leq w_{at_{j+1}} \leq \dots \leq w_{at_i} \\
w_{at_1} &\leq \dots \leq w_{at_{j-1}} \leq w_{at_{i+1}} < w_{at_j} \leq \dots \leq w_{at_{i-1}}
\end{aligned}$$

Note that each position decreases in value, even strictly at the  $j$ -th position. As such, the exponential average  $\beta_a^{(t-1)}$  decreases as well for  $t < t_{i+1}$ ; it remains constant for  $t \geq t_{i+1}$  as it only depends on the  $B_a$  most valuable impressions assigned up to  $t$  which remain the same. We can thus simultaneously minimize  $\beta_a^{(t)}$  for each  $t$  by putting  $\mathbf{X}_a$  in non-decreasing order. This reordering does not affect  $\beta_a^{(T)}$  or the other terms in  $(\star)$ , so we may indeed assume that values are non-decreasing. □

In light of Lemma 4, we can write  $(\star)$  as follows.

492 **Lemma 5.** We have

$$(\star) = \frac{1}{\alpha_B} \sum_{i=1}^{I_a - \ell_a} \left( w_{at_i} - \beta_a^{(t_{i-1})} \right) + \sum_{i=I_a - \ell_a + 1}^{I_a} w_{at_i}.$$

493 *Proof.* Impression values are non-decreasing due to Lemma 4, so  $w_{at_i}$  is the  $i$ -th least valuable  
 494 impression in  $\mathbf{X}_a$ . The impressions  $\{I_a - \ell_a + 1, \dots, I_a\} = \mathbf{X}_a \cap \mathbf{P}_a$  are thus the most valuable.  
 495 We can now write  $(\star)$  as

$$\frac{1}{\alpha_B} \sum_{t \in \mathbf{X}_a \setminus \mathbf{P}_a} \left( w_{at} - \beta_a^{(t_{i-1})} \right) + \sum_{t \in \mathbf{P}_a \cap \mathbf{X}_a} w_{at} = \frac{1}{\alpha_B} \sum_{i=1}^{I_a - \ell_a} \left( w_{at_i} - \beta_a^{(t_{i-1})} \right) + \sum_{i=I_a - \ell_a + 1}^{I_a} w_{at_i}$$

496 where  $\beta_a^{(t_{i-1})} = \beta_a^{(t_{i-1})}$  as there was no change to the dual variable of advertiser  $a$  since no  
 497 impression in  $\{t_{i-1} + 1, \dots, t_i - 1\}$  was allocated to  $a$ .  $\square$

498 Combining Lemmas 3 and 5, we obtain:

499 **Lemma 6.**  $\text{PRD} \leq \sum_a \text{PRD}_a$  where

$$\text{PRD}_a := \frac{1}{\alpha_B} \sum_{i=1}^{I_a - \ell_a} \left( w_{at_i} - \beta_a^{(t_{i-1})} \right) + \sum_{i=I_a - \ell_a + 1}^{I_a} w_{at_i} + (I_a - \ell_a) \beta_a^{(T)}.$$

500 In the following, we use the non-decreasing ordering of impressions in  $\mathbf{X}_a$  to compute  $\beta_a^{(t_{i-1})}$  and  
 501 bound  $\text{PRD}_a$  with a linear combination of values  $w_{at_i}$ . Consider the  $j$ -th impression  $t_j$  allocated  
 502 to  $a$ . Since we assume that impression values are non-decreasing, we know that  $t_j$  becomes the  
 503 most valuable impression right after it is allocated. After the allocation of the  $(j + 1)$ -th impres-  
 504 sion to  $a$ , it becomes the second most valuable impression, and so forth, until it is disposed after  
 505 the allocation of the  $(j + B_a)$ -th impression. The value  $w_{at_j}$  therefore appears alongside each  
 506 coefficient in the convex combination that defines  $\beta_a^{(t_{i-1})}$  for  $i \in \{j + 1, \dots, j + B_a\}$ . Expanding  
 507 each  $\beta_a^{(t_{i-1})}$  in the sum  $\sum_{i=1}^{I_a - \ell_a} \beta_a^{(t_{i-1})}$  in  $\text{PRD}_a$ , we thus observe that the coefficients of values  
 508  $w_{at_j}$  for  $j \leq I_a - \ell_a - B_a$  sum up to 1. We use this fact to cancel out most of the values in  
 509  $\sum_{i=1}^{I_a - \ell_a} w_{at_i}$ . What remains are only the values  $w_{at_i}$  for  $i \in \{I_a - \ell_a - B_a + 1, \dots, I_a - \ell_a\}$ . For  
 510  $i \in \{I_a - \ell_a - B_a + 1, \dots, I_a - B_a\}$ , we bound  $w_{at_i}$  by  $w_{at_{I_a - B_a}}$  which is really the best we can  
 511 hope for. Formally, we show:

512 **Lemma 7.** We have

$$\text{PRD}_a \leq \sum_{i=I_a - B_a + 1}^{I_a - \ell_a} \phi_i w_{at_i} + \sum_{i=I_a - \ell_a + 1}^{I_a} \psi_i w_{at_i} + w_{at_{I_a - B_a}} \Omega_a$$

513 with coefficients

$$\begin{aligned} \phi_i &:= (B_a - \ell_a) \frac{e^{\alpha/B_a} - 1}{e^{\alpha_{B_a}} - 1} e^{\alpha(I_a - i)/B_a} + \frac{1}{\alpha_B} \frac{e^{\alpha_{B_a}} - e^{\alpha(I_a - \ell_a - i)/B_a}}{e^{\alpha_{B_a}} - 1} \\ \psi_i &:= 1 + (B_a - \ell_a) \frac{e^{\alpha/B_a} - 1}{e^{\alpha_{B_a}} - 1} e^{\alpha(I_a - i)/B_a} \\ \Omega_a &:= \frac{1}{\alpha_B} \frac{1}{e^{\alpha_{B_a}} - 1} \left( \ell_a e^{\alpha_{B_a}} - \frac{e^{\alpha_{B_a}} - e^{\alpha(B_a - \ell_a)/B_a}}{e^{\alpha/B_a} - 1} \right). \end{aligned}$$

514 *Proof.* We start by rewriting the terms in  $\text{PRD}_a$  individually. Since we assume that the  
 515 values are non-decreasing, we can express  $\beta_a^{(t_{i-1})}$  as the exponential average of values  
 516  $w_{at_{i-B_a}}, w_{at_{i-B_a+1}}, \dots, w_{at_{i-1}}$  of the last  $B_a$  impressions (for simplicity, we set  $w_{at_j} = 0$  for  
 517  $j \leq 0$ ). Summing over multiple iterations, we thus obtain for the sum over the dual variables that

$$\sum_{i=1}^{I_a - \ell_a} \beta_a^{(t_{i-1})} = \frac{e^{\alpha/B_a} - 1}{e^{\alpha_{B_a}} - 1} \sum_{i=1}^{I_a - \ell_a} \sum_{j=i-B_a}^{i-1} w_{at_j} e^{\alpha(i-j-1)/B_a}$$

$$\begin{aligned}
&= \frac{e^{\alpha/B_a} - 1}{e_{B_a}^\alpha - 1} \sum_{j=1}^{I_a - \ell_a} w_{at_j} \sum_{i=j+1}^{\min\{j+B_a, I_a - \ell_a\}} e_{B_a}^{\alpha(i-j-1)/B_a} \\
&= \frac{e^{\alpha/B_a} - 1}{e_{B_a}^\alpha - 1} \sum_{j=1}^{I_a - \ell_a} w_{at_j} \sum_{i=1}^{\min\{B_a, I_a - \ell_a - j\}} e_{B_a}^{\alpha(i-1)/B_a} \\
&= \frac{e^{\alpha/B_a} - 1}{e_{B_a}^\alpha - 1} \sum_{j=1}^{I_a - B_a - \ell_a} w_{at_j} \sum_{i=1}^{I_a} e_{B_a}^{\alpha(i-1)/B_a} \\
&\quad + \frac{e^{\alpha/B_a} - 1}{e_{B_a}^\alpha - 1} \sum_{j=I_a - B_a - \ell_a + 1}^{I_a - \ell_a} w_a \sum_{i=1}^{I_a - \ell_a - j} e_{B_a}^{\alpha(i-1)/B_a} \\
&= \sum_{i=1}^{I_a - B_a - \ell_a} w_{at_i} + \frac{1}{e_{B_a}^\alpha - 1} \sum_{i=I_a - B_a - \ell_a + 1}^{I_a - \ell_a} w_{at_i} \left( e_{B_a}^{\alpha(I_a - \ell_a - i)/B_a} - 1 \right).
\end{aligned}$$

518 where for the last equality, we use that the two inner sums are geometric. We can use this expression  
519 to cancel out most of the terms of the first sum in  $\text{PRD}_a$ :

$$\begin{aligned}
&\sum_{i=1}^{I_a - \ell_a} \left( w_{at_i} - \beta_a^{(t_{i-1})} \right) \\
&= \sum_{i=1}^{I_a - \ell_a} w_{at_i} - \sum_{i=1}^{I_a - B_a - \ell_a} w_{at_i} - \frac{1}{\alpha_B (e_{B_a}^\alpha - 1)} \sum_{i=I_a - B_a - \ell_a + 1}^{I_a - \ell_a} w_{at_i} \left( e_{B_a}^{\alpha(I_a - \ell_a - i)/B_a} - 1 \right) \\
&= \sum_{i=I_a - B_a - \ell_a + 1}^{I_a - \ell_a} w_{at_i} \left( 1 - \frac{e_{B_a}^{\alpha(I_a - \ell_a - i)/B_a} - 1}{e_{B_a}^\alpha - 1} \right) \\
&= \sum_{i=I_a - B_a - \ell_a + 1}^{I_a - \ell_a} w_{at_i} \frac{e_{B_a}^\alpha - e_{B_a}^{\alpha(I_a - \ell_a - i)/B_a}}{e_{B_a}^\alpha - 1} \\
&= \sum_{i=I_a - B_a + 1}^{I_a - \ell_a} w_{at_i} \frac{e_{B_a}^\alpha - e_{B_a}^{\alpha(I_a - \ell_a - i)/B_a}}{e_{B_a}^\alpha - 1} + \sum_{i=I_a - B_a - \ell_a + 1}^{I_a - B_a} w_{at_i} \frac{e_{B_a}^\alpha - e_{B_a}^{\alpha(I_a - \ell_a - i)/B_a}}{e_{B_a}^\alpha - 1}. \quad (3)
\end{aligned}$$

520 We use that  $w_{at_i} \leq w_{at_{I_a - B_a}}$  for all  $i \leq I_a - B_a$  to upper bound the second sum, divided by  $\alpha_B$ , in  
521 (3) to

$$\begin{aligned}
&\frac{1}{\alpha_B} \sum_{i=I_a - B_a - \ell_a + 1}^{I_a - B_a} w_{at_i} \frac{e_{B_a}^\alpha - e_{B_a}^{\alpha(I_a - \ell_a - i)/B_a}}{e_{B_a}^\alpha - 1} \\
&\leq w_{at_{I_a - B_a}} \frac{1}{\alpha_B} \sum_{i=I_a - B_a - \ell_a + 1}^{I_a - B_a} \frac{e_{B_a}^\alpha - e_{B_a}^{\alpha(I_a - \ell_a - i)/B_a}}{e_{B_a}^\alpha - 1} \quad (4)
\end{aligned}$$

$$\begin{aligned}
&= w_{at_{I_a - B_a}} \frac{1}{\alpha_B} \frac{1}{e_{B_a}^\alpha - 1} \left( \ell_a e_{B_a}^\alpha - \sum_{i=B_a - \ell_a}^{B_a - 1} e_{B_a}^{\alpha i/B_a} \right) \\
&= w_{at_{I_a - B_a}} \underbrace{\frac{1}{\alpha_B} \frac{1}{e_{B_a}^\alpha - 1} \left( \ell_a e_{B_a}^\alpha - \frac{e_{B_a}^\alpha - e_{B_a}^{\alpha(B_a - \ell_a)/B_a}}{e_{B_a}^{\alpha/B_a} - 1} \right)}_{=\Omega_a}. \quad (5)
\end{aligned}$$

522 Furthermore, by definition of  $\beta_a^{(T)} = \beta_a^{(t_{I_a})}$ ,

$$(B_a - \ell_a) \beta_a^{(T)} = (B_a - \ell_a) \frac{e_{B_a}^{\alpha/B_a} - 1}{e_{B_a}^\alpha - 1} \sum_{i=I_a - B_a + 1}^{I_a} w_{at_i} e_{B_a}^{\alpha(I_a - i)/B_a}. \quad (6)$$

523 We combine (3), (5), and (6) and group terms to obtain the desired bound

$$\begin{aligned}
\text{PRD}_a &\leq \sum_{i=I_a-\ell_a+1}^{I_a} w_{at_i} + \frac{1}{\alpha_B} \sum_{i=I_a-B_a+1}^{I_a-\ell_a} w_{at_i} \frac{e_{B_a}^\alpha - e_{B_a}^{\alpha(I_a-\ell_a-i)/B_a}}{e_{B_a}^\alpha - 1} + w_{at_{I_a-B_a}} \Omega_a \\
&\quad + (B_a - \ell_a) \frac{e_{B_a}^{\alpha/B_a} - 1}{e_{B_a}^\alpha - 1} \sum_{i=I_a-B_a+1}^{I_a} w_{at_i} e_{B_a}^{\alpha(I_a-i)/B_a} \\
&= \sum_{i=I_a-B_a+1}^{I_a-\ell_a} w_{at_i} \underbrace{\left( (B_a - \ell_a) \frac{e_{B_a}^{\alpha/B_a} - 1}{e_{B_a}^\alpha - 1} e_{B_a}^{\alpha(I_a-i)/B_a} + \frac{1}{\alpha_B} \frac{e_{B_a}^\alpha - e_{B_a}^{\alpha(I_a-\ell_a-i)/B_a}}{e_{B_a}^\alpha - 1} \right)}_{=\phi_i} \\
&\quad + \sum_{i=I_a-\ell_a+1}^{I_a} w_{at_i} \underbrace{\left( 1 + (B_a - \ell_a) \frac{e_{B_a}^{\alpha/B_a} - 1}{e_{B_a}^\alpha - 1} e_{B_a}^{\alpha(I_a-i)/B_a} \right)}_{=\psi_i} + w_{I_a-B_a} \Omega_a
\end{aligned}$$

524

□

525 We can express ALG analogously:

526 **Lemma 8.** We have  $\text{ALG} = \sum_a \text{ALG}_a$  where

$$\text{ALG}_a := \sum_{i=I_a-B_a+1}^{I_a} w_{at_i}.$$

527 *Proof.* We have  $\text{ALG} = \sum_a \sum_{t \in \mathbf{S}_a} w_{at}$ . As we always dispose of the least valuable impression  
528 in Algorithm 1,  $\mathbf{S}_a$  are the  $B_a$  most valuable impressions in  $\mathbf{X}_a$ . Due to Lemma 4, these are  
529  $\mathbf{S}_a = \{I_a - B_a + 1, \dots, I_a\}$  and hence  $\sum_{t \in \mathbf{S}_a} w_{at} = \sum_{i=I_a-B_a+1}^{I_a} w_{at_i} = \text{ALG}_a$ . □

530 We upper bound the ratio  $\text{PRD}/\text{ALG}$  by  $\max_a \text{PRD}_a/\text{ALG}_a$ . To this end, we fix an advertiser  $a$   
531 and upper bound the ratio  $\text{PRD}_a/\text{ALG}_a$ . Recall from Lemmas 7 and 8 that we can express  $\text{PRD}_a$   
532 and  $\text{ALG}_a$  as linear combination over impression values. We could obtain a natural upper bound by  
533 comparing impression value coefficients. However, in the following lemma, we show how to use the  
534 non-decreasing ordering due to Lemma 4 to obtain a tighter bound.

535 We define

$$\Phi_a := \sum_{i=I_a-B_a+1}^{I_a-\ell_a} \phi_i \quad \text{and} \quad \Psi_a := \sum_{i=I_a-\ell_a+1}^{I_a} \psi_i$$

536 as the total factor mass on values  $w_{at_i}$  for  $\phi_i$  and  $\psi_i$ , respectively. Let  $\tau_a := (\Phi_a + \Psi_a + \Omega_a)/B_a$   
537 be the average factor. Recall that

$$\begin{aligned}
\text{PRD}_a &\leq \sum_{i=I_a-B_a+1}^{I_a-\ell_a} \phi_i w_{at_i} + \sum_{i=I_a-\ell_a+1}^{I_a} \psi_i w_{at_i} + w_{at_{I_a-B_a}} \Omega_a \\
\text{ALG}_a &= \sum_{i=I_a-B_a+1}^{I_a} w_{at_i}.
\end{aligned} \tag{7}$$

538 In the following lemma, we use that  $w_{at_i} \leq w_{at_j}$  for  $i \leq j$  due to Lemma 4, to further upper  
539 bound the RHS of 7 by a linear combination of the values, where we move mass from coefficients  
540 on  $w_{at_i}$  to coefficients on  $w_{at_j}$ . Additionally, we move mass from  $\Omega_a$  to coefficients  $\phi_i$  for  $i \in$   
541  $\{I_a - B_a + 1, \dots, I_a - \ell_a\}$  and from  $\phi_i$  to  $\psi_j$  for  $j \in \{I_a - \ell_a + 1, \dots, I_a\}$ . In the best case, we  
542 are able to redistribute mass equally across all values, in which case the consistency is given as the  
543 average factor  $\tau_a$ . Otherwise, the factors on the largest values dominate, giving us a consistency of  
544  $\Psi_a/\ell_a$ .

545 **Lemma 9.** We have

$$\frac{\text{PRD}_a}{\text{ALG}_a} \leq \begin{cases} \max \left\{ \tau_a, \frac{\Psi_a}{\ell_a} \right\} & \text{if } \ell_a > 0 \\ \tau_a & \text{otherwise} \end{cases}$$

546 where

$$\tau_a = 1 + \frac{1}{e_{B_a}^\alpha - 1} \frac{1}{\alpha_B} \left( e_{B_a}^\alpha - \frac{e_{B_a}^\alpha - 1}{\alpha_{B_a}} \right)$$

547 and

$$\frac{\Psi_a}{\ell_a} = 1 + \left( \frac{B_a}{\ell_a} - 1 \right) \frac{e_{B_a}^{\alpha \ell_a / B_a} - 1}{e_{B_a}^\alpha - 1}.$$

548 *Proof.* We calculate  $\tau_a$  and  $\Psi_a/\ell_a$  separately in Lemma 10 below. Our main goal is to distribute  
549 mass from the factors  $\phi_i, \psi_i$ , and from  $\Omega_a$  equally to the values  $w_{I_a-B_a+1}, \dots, w_{I_a}$ . We begin by  
550 taking a closer look at the factors  $\phi_i$  and  $\psi_i$ . First, note that  $\psi_i$  is always decreasing in  $i$  as

$$\psi_i = 1 + \underbrace{(B_a - \ell_a)}_{\geq 0} \underbrace{\frac{e_{B_a}^{\alpha/B_a} - 1}{e_{B_a}^\alpha - 1}}_{\geq 0} e_{B_a}^{\alpha(I_a-i)/B_a}.$$

551 We can therefore bound the linear combination over values in  $\{I_a - \ell_a + 1, \dots, I_a\}$  using the average  
552 value  $\bar{w}_\Psi := \frac{1}{\ell_a} \sum_{i=I_a-\ell_a+1}^{I_a} w_{at_i}$  as

$$\sum_{i=I_a-\ell_a+1}^{I_a} w_{at_i} \psi_i \leq \sum_{i=I_a-\ell_a+1}^{I_a} \bar{w}_\Psi \psi_i = \bar{w}_\Psi \Psi_a. \quad (8)$$

553 However,  $\phi_i$  is not always decreasing which can be seen by rearranging

$$\begin{aligned} \phi_i &= (B_a - \ell_a) \frac{e_{B_a}^{\alpha/B_a} - 1}{e_{B_a}^\alpha - 1} e^{\alpha(I_a-i)/B_a} + \frac{1}{\alpha_B} \frac{e_{B_a}^\alpha - e_{B_a}^{\alpha(I_a-\ell_a-i)/B_a}}{e_{B_a}^\alpha - 1} \\ &= \frac{1}{e_{B_a}^\alpha - 1} \left( (B_a - \ell_a) \left( e_{B_a}^{\alpha/B_a} - 1 \right) - \frac{1}{\alpha_B} e_{B_a}^{-\alpha \ell_a / B_a} \right) e^{\alpha(I_a-i)/B_a} + \frac{1}{\alpha_B} \frac{e_{B_a}^\alpha}{e_{B_a}^\alpha - 1}. \end{aligned}$$

554 We observe that  $\phi_i$  is decreasing if  $(B_a - \ell_a) \left( e_{B_a}^{\alpha/B_a} - 1 \right)$  is at least  $\frac{1}{\alpha_B} e_{B_a}^{-\alpha \ell_a / B_a}$ , and we analyze  
555 two cases based on the relationship of both terms.

556 Let us first assume that  $(B_a - \ell_a) \left( e_{B_a}^{\alpha/B_a} - 1 \right) \geq \frac{1}{\alpha_B} e_{B_a}^{-\alpha \ell_a / B_a}$  such that  $\phi_i$  is decreasing in  $i$   
557 which helps us to bound the linear combinations in Lemma 7 over  $\{I_a - B_a + 1, \dots, I_a - \ell_a\}$  and  
558  $\{I_a - \ell_a + 1, \dots, T\}$  by the average values  $\bar{w}_\Phi := \frac{1}{B_a - \ell_a} \sum_{i=I_a-B_a+1}^{I_a-\ell_a} w_{at_i}$  and  $\bar{w}_\Psi$ , respectively.  
559 We further use that  $w_{at_{I_a-B_a}} \leq \bar{w}_\Phi$  to charge mass from  $\Omega_a$  to  $\Phi_a$  and obtain due to (8) that

$$\begin{aligned} &\sum_{i=I_a-B_a+1}^{I_a-\ell_a} w_{at_i} \phi_i + \sum_{i=I_a-\ell_a+1}^{I_a} w_{at_i} \psi_i + w_{at_{I_a-B_a}} \Omega_a \\ &\leq \bar{w}_\Phi \Phi_a + \bar{w}_\Psi \Psi_a + w_{at_{I_a-B_a}} \Omega_a \end{aligned} \quad (9)$$

$$\begin{aligned} &\leq \bar{w}_\Phi (\Phi_a + \Omega_a) + \bar{w}_\Psi \Psi_a \\ &= \bar{w}_\Phi (B_a - \ell_a) \tau_a + \bar{w}_\Phi (\Phi_a + \Omega_a - (B_a - \ell_a) \tau_a) + \bar{w}_\Psi \Psi_a \\ &= \sum_{i=I_a-B_a+1}^{I_a-\ell_a} \tau_a w_{at_i} + \bar{w}_\Phi (\Phi_a + \Omega_a - (B_a - \ell_a) \tau_a) + \bar{w}_\Psi \Psi_a \end{aligned} \quad (10)$$

560 On the other hand, if  $(B_a - \ell_a) \left( e_{B_a}^{\alpha/B_a} - 1 \right) \leq \frac{1}{\alpha_B} e_{B_a}^{-\alpha \ell_a / B_a}$  we can no longer bound the values  
561 over  $\{I_a - B_a + 1, \dots, I_a - \ell_a\}$  by the average value  $\bar{w}_\Phi$ . However, each factor  $\phi_i$  is less than  $\tau_a$   
562 which can be seen by rearranging

$$\begin{aligned}\phi_i &= \frac{1}{e_{B_a}^\alpha - 1} \left( (B_a - \ell_a) \left( e_{B_a}^{\alpha/B_a} - 1 \right) - \frac{1}{\alpha_B} e_{B_a}^{-\alpha \ell_a / B_a} \right) e_{B_a}^{\alpha(I_a - i) / B_a} + \frac{1}{\alpha_B} \frac{e_{B_a}^\alpha}{e_{B_a}^\alpha - 1} \\ &\leq 1 + \frac{1}{e_{B_a}^\alpha - 1} \frac{1}{\alpha_B} \left( e_{B_a}^\alpha - \frac{e_{B_a}^\alpha - 1}{\alpha_{B_a}} \right) = \tau_a\end{aligned}$$

563 to the equivalent expression

$$\begin{aligned}&\underbrace{\left( (B_a - \ell_a) \left( e_{B_a}^{\alpha/B_a} - 1 \right) - \frac{1}{\alpha_B} e_{B_a}^{-\alpha \ell_a / B_a} \right)}_{\leq 0} \underbrace{e_{B_a}^{\alpha(I_a - i) / B_a}}_{\geq 0} \\ &\leq e_{B_a}^\alpha - 1 - \frac{1}{\alpha_B} \frac{e_{B_a}^\alpha - 1}{\alpha_{B_a}} = \underbrace{\left( 1 - \frac{1}{\alpha_B \cdot \alpha_{B_a}} \right)}_{\geq 0} \underbrace{(e_{B_a}^\alpha - 1)}_{\geq 0}\end{aligned}$$

564 which is true since the LHS is  $\leq 0$  and the RHS  $\geq 0$ . We can thus charge  $\tau_a - \phi_i$  of mass from  $\Omega_a$  to  
565 the coefficients  $\phi_i$  for each  $i \in \{I_a - B_a + 1, \dots, I_a - \ell_a\}$  which yields

$$\begin{aligned}&\sum_{i=I_a-B_a+1}^{I_a-\ell_a} w_{at_i} \phi_i + \sum_{i=I_a-\ell_a+1}^{I_a} w_{at_i} \psi_i + w_{at_{I_a-B_a}} \Omega_a \\ &\leq \sum_{i=I_a-B_a+1}^{I_a-\ell_a} w_{at_i} \phi_i + \bar{w}_\Psi \Psi_a + w_{at_{I_a-B_a}} \Omega_a \\ &= \sum_{i=I_a-B_a+1}^{I_a-\ell_a} \tau_a w_{at_i} - \sum_{i=I_a-B_a+1}^{I_a-\ell_a} w_{at_i} \underbrace{(\tau_a - \phi_i)}_{\geq 0} + \bar{w}_\Psi \Psi_a + w_{at_{I_a-B_a}} \Omega_a \\ &\leq \sum_{i=I_a-B_a+1}^{I_a-\ell_a} \tau_a w_{at_i} - \sum_{i=I_a-B_a+1}^{I_a-\ell_a} w_{at_{I_a-B_a}} (\tau_a - \phi_i) + \bar{w}_\Psi \Psi_a + w_{at_{I_a-B_a}} \Omega_a \\ &= \sum_{i=I_a-B_a+1}^{I_a-\ell_a} \tau_a w_{at_i} + w_{at_{I_a-B_a}} (\Phi_a + \Omega_a - (B_a - \ell_a) \tau_a) + \bar{w}_\Psi \Psi_a\end{aligned}\tag{11}$$

566 In both cases (10) and (11), we have shown that

$$\begin{aligned}&\sum_{i=I_a-B_a+1}^{I_a-\ell_a} w_{at_i} \phi_i + \sum_{i=I_a-\ell_a+1}^{I_a} w_{at_i} \psi_i + w_{at_{I_a-B_a}} \Omega_a \\ &\leq \sum_{i=I_a-B_a+1}^{I_a-\ell_a} \tau_a w_{at_i} + v (\Phi_a + \Omega_a - (B_a - \ell_a) \tau_a) + \bar{w}_\Psi \Psi_a\end{aligned}$$

567 for a  $v \leq \bar{w}_\Psi$ . If  $\ell_a > 0$ , we can use  $v \leq \bar{w}_\Psi$  to charge the remaining mass to  $\Psi_a$  if the factors over  
568  $\{I_a - \ell_a + 1, \dots, T\}$  leave enough space. In symbols, this means

$$\begin{aligned}&\sum_{i=T-B_a+1}^{I_a-\ell_a} \tau_a w_{at_i} + v (\Phi_a + \Omega_a - (B_a - \ell_a) \tau_a) + \bar{w}_\Psi \Psi_a \\ &\leq \sum_{i=T-B_a+1}^{I_a-\ell_a} \tau_a w_{at_i} + \bar{w}_\Psi \max \{ \Phi_a + \Omega_a - (B_a - \ell_a) \tau_a, 0 \} + \bar{w}_\Psi \Psi_a \\ &= \sum_{i=T-B_a+1}^{I_a-\ell_a} \tau_a w_{at_i} + \bar{w}_\Psi \max \{ \Phi_a + \Psi_a + \Omega_a - (B_a - \ell_a) \tau_a, \Psi_a \} \\ &= \sum_{i=T-B_a+1}^{I_a-\ell_a} \tau_a w_{at_i} + \bar{w}_\Psi \max \{ \ell_a \tau_a, \Psi_a \}\end{aligned}$$



$$\begin{aligned}
&\leq \tau_a \sum_{i=T-B_a+1}^{I_a-\ell_a} w_{at_i} + \max \left\{ \tau_a, \frac{\Psi_a}{\ell_a} \right\} \sum_{i=T-\ell_a+1}^{I_a} w_{at_i} \\
&\leq \max \left\{ \tau_a, \frac{\Psi_a}{\ell_a} \right\} \sum_{t \in S_a} w_{at}.
\end{aligned}$$

569 If  $\ell_a = 0$ , we have  $\Psi_a = 0$  and immediately obtain by definition of  $\tau_a$  that

$$\sum_{i=I_a-B_a+1}^{I_a-\ell_a} \tau_a w_{at_i} + v(\Phi_a + \Omega_a - (B_a - \ell_a) \tau_a) + \bar{w}_\Psi \Psi_a = \sum_{i=I_a-B_a+1}^{I_a-\ell_a} \tau_a w_{at_i}.$$

570

□

571 **Lemma 10.** *We have*

$$\frac{\Psi_a}{\ell_a} = 1 + \left( \frac{B_a}{\ell_a} - 1 \right) \frac{e_{B_a}^{\alpha \ell_a / B_a} - 1}{e_{B_a}^\alpha - 1}$$

572 and

$$\tau_a = 1 + \frac{1}{e_{B_a}^\alpha - 1} \frac{1}{\alpha_B} \left( e_{B_a}^\alpha - \frac{e_{B_a}^\alpha - 1}{\alpha_{B_a}} \right).$$

573 *Proof.* We compute

$$\begin{aligned}
\Phi_a &= \sum_{i=T-B_a+1}^{T-\ell_a} \phi_i \\
&= \sum_{i=T-B_a+1}^{T-\ell_a} \left( \frac{1}{e_{B_a}^\alpha - 1} \left( (B_a - \ell_a) \left( e_{B_a}^{\alpha/B_a} - 1 \right) - \frac{1}{\alpha_B} e_{B_a}^{-\alpha \ell_a / B_a} \right) e_{B_a}^{\alpha(T-i)/B_a} + \frac{1}{\alpha_B} \frac{e_{B_a}^\alpha}{e_{B_a}^\alpha - 1} \right) \\
&= \frac{1}{e_{B_a}^\alpha - 1} \left( (B_a - \ell_a) \left( e_{B_a}^{\alpha/B_a} - 1 \right) - \frac{1}{\alpha_B} e_{B_a}^{-\alpha \ell_a / B_a} \right) \frac{e_{B_a}^\alpha - e_{B_a}^{\alpha \ell_a / B_a}}{e_{B_a}^{\alpha/B_a} - 1} + (B_a - \ell_a) \frac{1}{\alpha_B} \frac{e_{B_a}^\alpha}{e_{B_a}^\alpha - 1} \\
&= \frac{1}{e_{B_a}^\alpha - 1} (B_a - \ell_a) \left( e_{B_a}^\alpha - e_{B_a}^{\alpha \ell_a / B_a} + \frac{1}{\alpha_B} e_{B_a}^\alpha \right) - \frac{1}{e_{B_a}^\alpha - 1} \frac{1}{\alpha_B} \frac{e_{B_a}^{\alpha - \alpha \ell_a / B_a} - 1}{e_{B_a}^{\alpha/B_a} - 1}
\end{aligned}$$

574 and

$$\begin{aligned}
\Psi_a &= \sum_{i=T-\ell_a+1}^T \psi_i \\
&= \sum_{i=T-\ell_a+1}^T \left( 1 + (B_a - \ell_a) \frac{e_{B_a}^{\alpha/B_a} - 1}{e_{B_a}^\alpha - 1} e_{B_a}^{\alpha(T-i)/B_a} \right) \\
&= \ell_a + (B_a - \ell_a) \frac{e_{B_a}^{\alpha/B_a} - 1}{e_{B_a}^\alpha - 1} \frac{e_{B_a}^{\alpha \ell_a / B_a} - 1}{e_{B_a}^{\alpha/B_a} - 1} \\
&= \ell_a + (B_a - \ell_a) \frac{e_{B_a}^{\alpha \ell_a / B_a} - 1}{e_{B_a}^\alpha - 1}.
\end{aligned}$$

575 **Summing up,**

$$\begin{aligned}
&\Phi_a + \Psi_a + \Omega_a \\
&= \frac{1}{e^\alpha - 1} (B_a - \ell_a) \left( e_{B_a}^\alpha - e_{B_a}^{\alpha \ell_a / B_a} + \frac{1}{\alpha_B} e_{B_a}^\alpha \right) - \frac{1}{e_{B_a}^\alpha - 1} \frac{1}{\alpha_B} \frac{e_{B_a}^{\alpha - \alpha \ell_a / B_a} - 1}{e_{B_a}^{\alpha/B_a} - 1} \\
&\quad + \ell_a + (B_a - \ell_a) \frac{e_{B_a}^{\alpha \ell_a / B_a} - 1}{e_{B_a}^\alpha - 1} + \frac{1}{e_{B_a}^\alpha - 1} \frac{1}{\alpha_B} \left( \ell_a e_{B_a}^\alpha - \frac{e_{B_a}^\alpha - e_{B_a}^{\alpha(B_a - \ell_a)/B_a}}{e_{B_a}^{\alpha/B_a} - 1} \right)
\end{aligned}$$

$$\begin{aligned}
&= \frac{1}{e_{B_a}^\alpha - 1} (B_a - \ell_a) \left( e_{B_a}^\alpha - 1 + \frac{1}{\alpha_B} e_{B_a}^\alpha \right) - \frac{1}{e_{B_a}^\alpha - 1} \frac{1}{\alpha_B} \frac{e_{B_a}^\alpha - 1}{e_{B_a}^{\alpha/B_a} - 1} \\
&\quad + \ell_a + \frac{1}{e_{B_a}^\alpha - 1} \frac{1}{\alpha_B} \ell_a e_{B_a}^\alpha \\
&= B_a + \frac{1}{e_{B_a}^\alpha - 1} \frac{1}{\alpha_B} (B_a - \ell_a) e_{B_a}^\alpha - \frac{1}{e_{B_a}^\alpha - 1} \frac{1}{\alpha_B} \frac{e_{B_a}^\alpha - 1}{e_{B_a}^{\alpha/B_a} - 1} + \frac{1}{e_{B_a}^\alpha - 1} \frac{1}{\alpha_B} \ell_a e_{B_a}^\alpha \\
&= B_a + \frac{1}{e_{B_a}^\alpha - 1} \frac{1}{\alpha_B} B_a e_{B_a}^\alpha - \frac{1}{e_{B_a}^\alpha - 1} \frac{1}{\alpha_B} \frac{e_{B_a}^\alpha - 1}{e_{B_a}^{\alpha/B_a} - 1} \\
&= B_a + \frac{1}{e_{B_a}^\alpha - 1} \frac{1}{\alpha_B} \left( B_a e_{B_a}^\alpha - \frac{e_{B_a}^\alpha - 1}{e_{B_a}^{\alpha/B_a} - 1} \right)
\end{aligned}$$

576 which does no longer depend on  $\ell_a$ . Dividing  $\Psi_a$  by  $\ell_a$  and  $\Phi_a + \Psi_a + \Omega_a$  by  $B_a$  yields the result.  $\square$

577 Putting everything together, we have  $\text{PRD}/\text{ALG} \leq \max_a \max \{ \tau_a, \max_{\ell_a \in \{1, \dots, B_a\}} \Psi_a / \ell_a \}$  as  $\tau_a$   
578 does not depend on  $\ell_a$ . The reader can refer back to Figure 2 for an illustration of this upper bound.  
579 In the following lemma, we further analyze analytically  $\max_{\ell_a \in \{1, \dots, B_a\}} \Psi_a / \ell_a$  and compare it with  
580  $\tau_a$  to obtain the upper bound:

581 **Lemma 11.** *The consistency of Algorithm 1 is given by*

$$\text{PRD}/\text{ALG} \leq \left( 1 + \frac{1}{e_B^\alpha - 1} \max \left\{ \frac{1}{\alpha_B} \left( e_B^\alpha - \frac{e_B^\alpha - 1}{\alpha_B} \right), \ln(e_B^\alpha) \right\} \right).$$

582 *Proof.* Due to Lemma 9, it is sufficient to show

$$1 + \frac{1}{e_B^\alpha - 1} \max \left\{ \frac{1}{\alpha_B} \left( e_B^\alpha - \frac{e_B^\alpha - 1}{\alpha_B} \right), \ln(e_B^\alpha) \right\} \geq \begin{cases} \max \{ \tau_a, \Psi_a / \ell_a \} & \text{if } \ell_a > 0 \\ \tau_a & \text{otherwise.} \end{cases}$$

583 By Lemma 10, we know for the first term in the maximum that

$$\tau_a = 1 + \frac{1}{e_{B_a}^\alpha - 1} \frac{1}{\alpha_B} \left( e_{B_a}^\alpha - \frac{e_{B_a}^\alpha - 1}{\alpha_{B_a}} \right)$$

584 This term is maximized for  $B_a = B$  since

$$\begin{aligned}
1 + \frac{1}{e_{B_a}^\alpha - 1} \frac{1}{\alpha_B} \left( e_{B_a}^\alpha - \frac{e_{B_a}^\alpha - 1}{B_a (e_{B_a}^{\alpha/B_a} - 1)} \right) &= 1 + \frac{1}{\alpha_B} \left( \frac{e_{B_a}^\alpha}{e_{B_a}^\alpha - 1} - \frac{1}{\alpha_{B_a}} \right) \\
&\leq 1 + \frac{1}{\alpha_B} \left( \frac{e_B^\alpha}{e_B^\alpha - 1} - \frac{1}{\alpha_B} \right) = 1 + \frac{1}{e_B^\alpha - 1} \frac{1}{\alpha_B} \underbrace{\left( e_B^\alpha - \frac{e_B^\alpha - 1}{\alpha_B} \right)}_{=: p(\alpha)}
\end{aligned}$$

585 due to Lemma 2. The lemma statement therefore follows immediately if  $\ell_a = 0$ . We may thus  
586 assume that  $\ell_a > 0$  and use Lemma 10 to determine the second term in the maximum as

$$\frac{\Phi_a}{\ell_a} = 1 + \frac{1}{e_{B_a}^\alpha - 1} \left( \frac{1}{x} - 1 \right) (e_{B_a}^{\alpha x} - 1)$$

587 where  $x =: \ell_a / B_a$ . The second term behaves similarly to the first as

$$\frac{\Phi_a}{\ell_a} = 1 + \frac{1}{e_{B_a}^\alpha - 1} \left( \frac{1}{x} - 1 \right) (e_{B_a}^{\alpha x} - 1) \leq 1 + \frac{1}{e_B^\alpha - 1} \left( \frac{1}{x} - 1 \right) (e_B^{\alpha x} - 1)$$

588 since  $(e_{B_a}^{\alpha x} - 1) / (e_{B_a}^\alpha - 1) \leq (e_B^{\alpha x} - 1) / (e_B^\alpha - 1)$ . We define  $g(\alpha, x) := \left( \frac{1}{x} - 1 \right) (e_B^{\alpha x} - 1)$   
589 such that we can write

$$\max \left\{ \frac{\Phi_a + \Psi_a + \Omega_a}{B_a}, \frac{\Psi_a}{\ell_a} \right\} \leq 1 + \frac{1}{e_B^\alpha - 1} \max \{ p(\alpha), g(\alpha, x) \}.$$

590 We want to remove the dependency on  $x$  in  $g$  by maximizing  $g$  over  $x \in [0, 1]$  for a fixed  $\alpha$ . As  
 591  $g(\alpha, x)$  is continuous, it suffices to evaluate  $g$  in both endpoints and find the stationary points. We  
 592 have

$$g(\alpha, 0) = \lim_{x \rightarrow 0} \left( \frac{1}{x} - 1 \right) (e_B^{\alpha x} - 1) = \lim_{x \rightarrow 0} \frac{(1-x)(e_B^{\alpha x} - 1)}{x} \\ = \lim_{x \rightarrow 0} -(e_B^{\alpha x} - 1) + (1-x) \ln(e_B^{\alpha}) e_B^{\alpha x} = \ln(e_B^{\alpha})$$

593 by L'Hopital. Further,  $g(\alpha, 1) = 0$ . Next, we find the stationary points  $x^* \in [0, 1]$  as solutions to the  
 594 equation

$$\frac{\partial}{\partial x} g(\alpha, x^*) = \ln(e_B^{\alpha}) \left( \frac{1}{x^*} - 1 \right) e_B^{\alpha x^*} - \frac{e_B^{\alpha x^*} - 1}{(x^*)^2} = 0$$

595 which is equivalent to

$$e_B^{\alpha x^*} - 1 = \ln(e_B^{\alpha}) (x^*)^2 \left( \frac{1}{x^*} - 1 \right) e_B^{\alpha x^*}.$$

596 There is no closed form solution for  $x^*$ , but we can replace  $e_B^{\alpha x^*} - 1$  in  $g$  with the RHS of the above.  
 597 This yields a new function

$$h(\alpha, y) = \left( \frac{1}{y} - 1 \right) \ln(e_B^{\alpha}) y^2 \left( \frac{1}{y} - 1 \right) e_B^{\alpha y} = \ln(e_B^{\alpha}) (1-y)^2 e_B^{\alpha y}$$

598 with  $h(\alpha, x^*) = g(\alpha, x^*)$ . We can thus maximize  $h$  over  $y \in [0, 1]$  to obtain an upper bound on  
 599  $g(x^*)$ . Note that  $h(\alpha, 0) = \ln(e_B^{\alpha}) = g(\alpha, 0)$  and  $h(\alpha, 1) = 0 = g(\alpha, 1)$ . To this end, let  $y^*$  be such  
 600 that

$$\frac{\partial}{\partial y^*} h(\alpha, y^*) = \ln(e_B^{\alpha})^2 (1-y^*)^2 e_B^{\alpha y^*} - 2 \ln(e_B^{\alpha}) (1-y^*) e_B^{\alpha y^*} = 0$$

601 which is equivalent to  $\ln(e_B^{\alpha}) (1-y^*) - 2 = 0$  or  $y^* = 1 - \frac{2}{\ln(e_B^{\alpha})}$ . We evaluate  $h$  in  $y^*$  and obtain

$$h(\alpha, y^*) = \alpha \ln(e_B) \left( \frac{2}{\alpha \ln(e_B)} \right)^2 e_B^{\alpha - \frac{2}{\ln(e_B)}} = \frac{4}{\alpha \ln(e_B) e^2} e_B^{\alpha}.$$

602 Note that  $y^* \geq 0 \iff \alpha \geq 2/\ln(e_B)$ . Furthermore,  $h^*(\alpha)$  always exceeds the endpoint  $g(\alpha, 0)$ :  
 603 We calculate

$$h^*(\alpha) := h(\alpha, y^*) = \frac{4}{\ln(e_B^{\alpha}) e^2} e_B^{\alpha} \\ \geq \frac{4}{\ln(e_B^{\alpha}) e^2} e^2 \ln(e_B^{\alpha/2})^2 \\ = \ln(e_B^{\alpha})$$

604 where the inequality is due to  $e^z \geq ez$  for  $z = \ln(e_B^{\alpha/2}) \geq 0$ . Therefore, for all  $x \in [0, 1]$ ,

$$g(\alpha, x) \leq \begin{cases} \ln(e_B^{\alpha}) & \text{if } \alpha \leq \frac{2}{\ln(e_B)} \\ h^*(\alpha) & \text{otherwise.} \end{cases}$$

605 We consider both intervals separately. Let us first consider the the case when  $\alpha \in \left[0, \frac{2}{\ln(e_B)}\right]$ . If  
 606  $B < \infty$ , there could be multiple intersection points between  $p(\alpha)$  and  $\alpha \ln(e_B)$ . However, the  
 607 situation is easier if  $B \rightarrow \infty$  as the intersection points given by

$$p(\alpha) = \frac{1}{\alpha} \left( e^{\alpha} - \frac{e^{\alpha} - 1}{\alpha} \right) = \alpha \iff \alpha e^{\alpha} - e^{\alpha} + 1 = \alpha^3$$

608 are at  $\alpha = 1$  and  $\alpha^* \approx 1.79$ , whereas  $\alpha \ln(e_B)$  dominates  $p(\alpha)$  between 1 and  $\alpha^*$ .

609 It remains to consider the case  $\alpha \geq \frac{2}{\ln(e_B)}$ . Again, there can be many intersection points of  $p(\alpha)$   
 610 with  $\alpha \ln(e_B)$  and  $h^*(\alpha)$ . However, if  $B \rightarrow \infty$ , then  $p(\alpha)$  already dominates  $h^*(\alpha)$  for  $\alpha > 2$   
 611 which we can see as follows. First,

$$h^*(\alpha) = \frac{4}{\alpha} e^{\alpha-2} \leq \frac{1}{\alpha} \left( e^{\alpha} - \frac{e^{\alpha} - 1}{\alpha} \right) = p(\alpha)$$

$$\iff 4e^{-2} \leq 1 - \frac{1 - e^{-\alpha}}{\alpha}.$$

612 We can see that  $\frac{1-e^{-\alpha}}{\alpha}$  is decreasing in  $\alpha$  as

$$\frac{\partial}{\partial \alpha} \frac{1 - e^{-\alpha}}{\alpha} = \frac{e^{-\alpha}(\alpha - e^{\alpha} + 1)}{\alpha^2} \leq 0$$

613 which holds as  $1 + \alpha \leq e^{\alpha}$ . Finally, we check that  $h^*(2) = 2 \leq 2.10 \approx p(2)$ .  $\square$

## 614 B Generalized Assignment Problem

615 The generalized assignment problem (GAP) is a generalization of Display Ads where impressions  
616  $t$  can take up any size  $u_{at}$  in the budget constraint of advertiser  $a$ . This formulation encompasses  
617 both Display Ads and Ad Words, and we empirically compare it to the Ad Words algorithm with  
618 predictions due to Mahdian et al. (2007) in Section C.3. For simplicity of presentation, we assume  
619 that budgets are all 1 and instead,  $u_{at} \rightarrow 0$ . However, as before it is possible to adapt the algorithm  
620 to work with large sizes  $u_{at}$ . We state the LP below.

| GAP Primal                               | GAP Dual                                         |
|------------------------------------------|--------------------------------------------------|
| $\max \sum_{a,t} w_{at} x_{at}$          | $\min \sum_a \beta_a + \sum_t z_t$               |
| $\forall a: \sum_t u_{at} x_{at} \leq 1$ | $\forall a, t: z_t \geq w_{at} - u_{at} \beta_a$ |
| $\forall t: \sum_a x_{at} \leq 1$        |                                                  |

622 Algorithm 2 is a generalization of Algorithm 1 to GAP. An immediate difference is that the discounted  
623 gain  $w_{at} - u_{at} \beta_a$  respects the impression size  $u_{at}$  in accordance with the changed dual constraint.  
624 We still follow the predicted advertiser if its discounted gain still is a sufficiently high fraction of the  
625 maximum discounted gain. However, we might now have to remove multiple impressions with least  
626 value-size ratio to accommodate the new impression. The update for  $\beta_a$  also differs and is based on  
627 value-size ratios of impressions allocated to  $a$ : For a fixed advertiser  $a$  let  $U_a = \sum_{t \in \mathbf{X}_a} u_{at}$ , be the  
628 total size of all impressions ever allocated to  $a$ . For any  $x \in (0, U_a]$  define  $\frac{w_x}{u_x}$  as the minimal ratio  
629 such that

$$\sum_{t \in \mathbf{X}_a: \frac{w_{at}}{u_{at}} \leq \frac{w_x}{u_x}} u_{at} > x. \quad (12)$$

630 Then, we can naturally define  $\beta_a$  as the exponential average over ratios  $\frac{w_x}{u_x}$ . As before, we also  
631 assume that there exists a dummy advertiser that only receives impressions of zero value-size ratio  
632 and that all advertisers are initially filled up with impressions of zero value.

### 633 B.1 Robustness

634 **Theorem 12.** *Algorithm 1 has a robustness of*

$$\frac{\text{ALG}}{\text{OPT}} \geq \frac{e^{\alpha} - 1}{\alpha e^{\alpha}}$$

635 *Proof.* Assume we assign impression  $t$  to advertiser  $a$  while disposing of some impressions to make  
636 space. We will bound the dual increase as a multiple of the primal increase. We now assume that after  
637 allocating  $t$  to  $a$ , it becomes the impression with highest value-size ratio (a general proof follows  
638 analogously to the proof of robustness for Display Ads in Section A.1). The primal increase is simply

$$\Delta P = \int_{U_a - u_{at}}^{U_a} \frac{w_x}{u_x} dx - \int_{U_a - 1 - u_{at}}^{U_a - 1} \frac{w_x}{u_x} dx = w_{at} - \int_{U_a - 1 - u_{at}}^{U_a - 1} \frac{w_x}{u_x} dx.$$

---

**Algorithm 2** Exponential Averaging with Predictions for GAP

---

```

1: Input: Robustness-consistency trade-off parameter  $\alpha \in [1, \infty)$ 
2: For each advertiser  $a$ , initialize  $\beta_a \leftarrow 0$  and fill up  $a$  with zero-value impressions
3: for all arriving impressions  $t$  do
4:    $a_{(\text{PRD})} \leftarrow \text{PRD}(t)$ 
5:    $a_{(\text{EXP})} \leftarrow \arg \max_a \{w_{at} - u_{at}\beta_a\}$ 
6:   if  $\alpha (w_{a_{(\text{PRD})},t} - u_{a_{(\text{PRD})},t}\beta_{a_{(\text{PRD})}}) \geq w_{a_{(\text{EXP})},t} - u_{a_{(\text{EXP})},t}\beta_{a_{(\text{EXP})}}$  then
7:      $a \leftarrow a_{(\text{PRD})}$ 
8:   else
9:      $a \leftarrow a_{(\text{EXP})}$ 
10:  end if
11:  Dispose of impressions with least value-size ratio currently allocated to  $a$  until there is  $u_{at}$  of
    free space and allocate  $t$  to  $a$ 
12:  Let  $\frac{w_x}{u_x}$  as in (12) and update  $\beta_a \leftarrow \frac{\alpha}{e^\alpha - 1} \int_{U_a-1}^{U_a} \frac{w_x}{u_x} e^{\alpha(U_a-x)} dx$ 
13: end for

```

---

639 At the same time,

$$\begin{aligned}
\beta_a^{(t)} &= \frac{\alpha}{e^\alpha - 1} \int_{U_a-1}^{U_a} \frac{w_x}{u_x} e^{\alpha(U_a-x)} dx \\
&= \frac{\alpha}{e^\alpha - 1} \left( \int_{U_a-1-u_{at}}^{U_a-u_{at}} \frac{w_x}{u_x} e^{\alpha(U_a-x)} dx + \int_{U_a-u_{at}}^{U_a} \frac{w_x}{u_x} e^{\alpha(U_a-x)} dx - \int_{U_a-1-u_{at}}^{U_a-1} \frac{w_x}{u_x} e^{\alpha(U_a-x)} dx \right) \\
&= \frac{\alpha}{e^\alpha - 1} \left( e^{\alpha u_{at}} \int_{U_a-1-u_{at}}^{U_a-u_{at}} \frac{w_x}{u_x} e^{\alpha(U_a-x-u_{at})} dx + w_{at} - \int_{U_a-1-u_{at}}^{U_a-1} \frac{w_x}{u_x} e^{\alpha(U_a-x)} dx \right) \\
&= e^{\alpha u_{at}} \beta_a^{(t-1)} + \frac{\alpha}{e^\alpha - 1} \left( w_{at} - \int_{U_a-1-u_{at}}^{U_a-1} \frac{w_x}{u_x} e^{\alpha(U_a-x)} dx \right)
\end{aligned}$$

640 We set  $z_t = \alpha (w_{at} - u_{at}\beta_a^{(t-1)})$  and obtain, since  $e^{\alpha u_{at}} - 1 = \alpha u_{at}$  due to  $u_{at} \rightarrow 0$ ,

$$\begin{aligned}
\Delta D &= \beta_a^{(t)} - \beta_a^{(t-1)} + z_t \\
&= (e^{\alpha u_{at}} - 1) \beta_a^{(t-1)} + \frac{\alpha}{e^\alpha - 1} \left( w_{at} - \int_{U_a-1-u_{at}}^{U_a-1} \frac{w_x}{u_x} e^{\alpha(U_a-x)} dx \right) + \alpha (w_{at} - u_{at}\beta_a^{(t-1)}) \\
&= \alpha u_{at} \beta_a^{(t-1)} + \frac{\alpha}{e^\alpha - 1} \left( w_{at} - \int_{U_a-1-u_{at}}^{U_a-1} \frac{w_x}{u_x} e^{\alpha(U_a-x)} dx \right) + \alpha (w_{at} - u_{at}\beta_a^{(t-1)}) \\
&= \frac{\alpha e^\alpha}{e^\alpha - 1} w_{at} - \frac{\alpha e^\alpha}{e^\alpha - 1} \int_{U_a-1-u_{at}}^{U_a-1} \frac{w_x}{u_x} dx \\
&= \frac{\alpha e^\alpha}{e^\alpha - 1} \Delta P.
\end{aligned}$$

641

□

## 642 B.2 Consistency

643 **Theorem 13.** Algorithm 1 has a consistency of

$$\frac{\text{ALG}}{\text{PRD}} \geq \left( 1 + \frac{1}{e^\alpha - 1} \max \left\{ \frac{1}{\alpha} \left( e^\alpha - \frac{e^\alpha - 1}{\alpha} \right), \alpha \right\} \right)^{-1}.$$

644 As before, we split the impressions  $t$  based on whether the algorithm followed the prediction or  
645 not. If the algorithm ignores the prediction, we can use that  $\alpha (w_{a_{(\text{PRD})},t} - u_{a_{(\text{PRD})},t}\beta_{a_{(\text{PRD})}}) \leq$

646  $w_{a(\text{EXP}),t} - u_{a(\text{EXP}),t}\beta_{a(\text{EXP})}$  due to Line 6 in Algorithm 2. With a similar calculation, we obtain

$$\begin{aligned} \text{PRD} &= \sum_a \text{PRD}_a \\ &= \sum_a \left( \sum_{t \in \mathbf{P}_a \cap \mathbf{X}_a} w_{at} + \frac{1}{\alpha} \sum_{t \in \mathbf{X}_a \setminus \mathbf{P}_a} w_{at} - \frac{1}{\alpha} \sum_{t \in \mathbf{X}_a \setminus \mathbf{P}_a} u_{at} \beta_a^{(t-1)} + \sum_{t \in \mathbf{P}_a \setminus \mathbf{X}_a} u_{at} \beta_a^{(t-1)} \right). \end{aligned}$$

647 Once again, we fix an advertiser  $a$ . Let  $\rho_a := \sum_{t \in \mathbf{P}_a \cap \mathbf{X}_a} u_{at}$  so that we can bound

$$\sum_{t \in \mathbf{P}_a \setminus \mathbf{X}_a} u_{at} \beta_a^{(t-1)} \leq (1 - \rho_a) \beta_a^{(T)}.$$

648 We still have to argue that the worst-case is when all impressions are ordered such that their value-size  
649 ratios are non-decreasing and the impressions in  $\mathbf{P}_a \cap \mathbf{X}_a$  are the ones with maximum value-size  
650 ratio among  $\mathbf{X}_a$ . The latter is obvious as it can only increase the value of PRD, so it remains to  
651 show that the non-decreasing value-size ordering minimizes the third sum in  $\text{PRD}_a$  (the first two  
652 sums are invariant under reordering). To this end, note that the value of  $\beta_a$  for GAP is the limit of  
653  $\beta_a$  for Display Ads in the following sense: For positive  $\epsilon \rightarrow 0$ , we can split each GAP-impression  
654  $t \in \mathbf{X}_a$  into  $\frac{u_t}{\epsilon}$  identical Display Ads-impressions with value  $\frac{w_t}{u_t}$ , while assuming a budget of  $1/\epsilon$ .  
655 Then, the GAP  $\beta_a$  and Display Ads  $\beta_a$  are identical. As we know from Display Ads, the worst case  
656 is achieved when the Display Ads-impressions with value  $\frac{w_t}{u_t}$  are in non-decreasing order. In this  
657 ordering, consecutive Display-Ads impressions with identical value  $\frac{w_t}{u_t}$  still correspond to the same  
658 GAP-impression  $t$ , so we also know that this ordering is the worst-case for GAP. We may therefore  
659 assume that the impressions are ordered such that their value-size ratios are non-decreasing. As such,  
660 we obtain

$$\beta_a^{(t)} = \frac{\alpha}{e^\alpha - 1} \int_{U_a^{(t)} - 1}^{U_a^{(t)}} \frac{w_x}{u_x} e^{\alpha(U_a^{(t)} - x)} dx = \int_{y-1}^y \frac{w_x}{u_x} e^{\alpha(y-x)} dx =: \beta_a^{(y)}$$

661 where  $y = U_a^{(t)}$ . Combined with the fact that  $\mathbf{P}_a \cap \mathbf{X}_a$  are last impressions in  $\mathbf{X}_a$ , we can now write

$$\begin{aligned} \sum_{t \in \mathbf{P}_a \cap \mathbf{X}_a} w_{at} + \frac{1}{\alpha} \sum_{t \in \mathbf{X}_a \setminus \mathbf{P}_a} w_{at} - \frac{1}{\alpha} \sum_{t \in \mathbf{X}_a \setminus \mathbf{P}_a} u_{at} \beta_a^{(t-1)} \\ = \int_{U_a - \rho}^{U_a} \frac{w_x}{u_x} dx + \frac{1}{\alpha} \int_0^{U_a - \rho_a} \frac{w_x}{u_x} dx - \frac{1}{\alpha} \int_0^{U_a - \rho_a} \beta_a^{(x)} dx \end{aligned}$$

662 This helps us to compute  $\beta_a^{(x)}$  in  $\text{PRD}_a$  and rewrite the whole term as a linear combination of  
663 value-size ratios.

664 **Lemma 14.** *We have*

$$\text{PRD}_a \leq \int_{U_a - 1}^{U_a - \rho_a} \frac{w_x}{u_x} \phi_x dx + \int_{U_a - \rho_a}^{U_a} \frac{w_x}{u_x} \psi_x dx + \frac{w_{U_a - 1}}{u_{U_a - 1}} \Omega_a$$

665 where

$$\begin{aligned} \phi_x &:= (1 - \rho_a) \frac{\alpha}{e^\alpha - 1} e^{\alpha(U_a - x)} + \frac{1}{\alpha} \frac{e^\alpha - e^{\alpha(U_a - \rho_a - x)}}{e^\alpha - 1} \\ \psi_x &:= 1 + (1 - \rho_a) \frac{\alpha}{e^\alpha - 1} e^{\alpha(U_a - x)} \\ \Omega_a &:= \frac{1}{\alpha} \frac{1}{e^\alpha - 1} \left( \rho_a e^\alpha - \frac{1}{\alpha} (e^\alpha - e^{\alpha(1 - \rho_a)}) \right) \end{aligned}$$

666 *Proof.* We rewrite the third sum in  $\text{PRD}_a$  to

$$\int_0^{U_a - \rho_a} \beta_a^{(x)} dx$$

$$\begin{aligned}
&= \frac{\alpha}{e^\alpha - 1} \int_0^{U_a - \rho_a} \int_{x-1}^x \frac{w_y}{u_y} e^{\alpha(x-y)} dy dx \\
&= \frac{\alpha}{e^\alpha - 1} \int_0^{U_a - \rho_a} \frac{w_y}{u_y} \int_0^{\min\{1, U_a - \rho_a - y\}} e^{\alpha x} dx dy \\
&= \frac{\alpha}{e^\alpha - 1} \int_0^{U_a - 1 - \rho_a} \frac{w_y}{u_y} \int_0^1 e^{\alpha x} dx dy + \frac{\alpha}{e^\alpha - 1} \int_{U_a - 1 - \rho_a}^{U_a - \rho_a} \frac{w_y}{u_y} \int_0^{U_a - \rho_a - y} e^{\alpha x} dx dy \\
&= \int_0^{U_a - 1 - \rho_a} \frac{w_y}{u_y} dy + \frac{1}{e^\alpha - 1} \int_{U_a - 1 - \rho_a}^{U_a - \rho_a} \frac{w_y}{u_y} \left( e^{\alpha(U_a - \rho_a - y)} - 1 \right) dy
\end{aligned}$$

667 where for the last equality, we simply evaluated the integral. Using this in place of the second sum in  
668  $\text{PRD}_a$  cancels out most of the terms of the second sum:

$$\begin{aligned}
&\int_0^{U_a - \rho_a} \frac{w_x}{u_x} dx - \int_0^{U_a - \rho_a} \beta_a^{(x)} dx \\
&= \int_0^{U_a - \rho_a} \frac{w_x}{u_x} dx - \int_0^{U_a - 1 - \rho_a} \frac{w_y}{u_y} dy - \frac{1}{e^\alpha - 1} \int_{U_a - 1 - \rho_a}^{U_a - \rho_a} \frac{w_y}{u_y} \left( e^{\alpha(U_a - \rho_a - y)} - 1 \right) dy \\
&= \int_{U_a - 1 - \rho_a}^{U_a - \rho_a} \frac{w_y}{u_y} \left( 1 - \frac{e^{\alpha(U_a - \rho_a - y)} - 1}{e^\alpha - 1} \right) dy \\
&= \int_{U_a - 1 - \rho_a}^{U_a - \rho_a} \frac{w_y}{u_y} \frac{e^\alpha - e^{\alpha(U_a - \rho_a - y)}}{e^\alpha - 1} dy \\
&= \int_{U_a - 1}^{U_a - \rho_a} \frac{w_y}{u_y} \frac{e^\alpha - e^{\alpha(U_a - \rho_a - y)}}{e^\alpha - 1} dy + \int_{U_a - 1 - \rho_a}^{U_a - 1} \frac{w_y}{u_y} \frac{e^\alpha - e^{\alpha(U_a - \rho_a - y)}}{e^\alpha - 1} dy. \tag{13}
\end{aligned}$$

669 We upper bound the third sum

$$\begin{aligned}
\frac{1}{\alpha} \int_{U_a - 1 - \rho_a}^{U_a - 1} \frac{w_y}{u_y} \frac{e^\alpha - e^{\alpha(U_a - \rho_a - y)}}{e^\alpha - 1} dy &\leq \frac{w_{U_a - 1}}{u_{U_a - 1}} \frac{1}{\alpha} \int_{U_a - 1 - \rho_a}^{U_a - 1} \frac{e^\alpha - e^{\alpha(U_a - \rho_a - y)}}{e^\alpha - 1} dy \\
&= \frac{w_{U_a - 1}}{u_{U_a - 1}} \frac{1}{\alpha} \frac{1}{e^\alpha - 1} \left( \rho_a e^\alpha - \int_{1 - \rho_a}^1 e^{\alpha y} dy \right) \\
&= \frac{w_{U_a - 1}}{u_{U_a - 1}} \frac{1}{\alpha} \frac{1}{e^\alpha - 1} \underbrace{\left( \rho_a e^\alpha - \frac{1}{\alpha} \left( e^\alpha - e^{\alpha(1 - \rho_a)} \right) \right)}_{=\Omega_a} \tag{14}
\end{aligned}$$

670 Furthermore,

$$(1 - \rho_a) \beta_a^{(U_a)} = (1 - \rho_a) \frac{\alpha}{e^\alpha - 1} \int_{U_a - 1}^{U_a} \frac{w_x}{u_x} e^{\alpha(U_a - x)} dx \tag{15}$$

671 Combining (13), (14), and (15) and grouping terms yields

$$\begin{aligned}
&\int_{U_a - \rho_a}^{U_a} \frac{w_x}{u_x} dx + \frac{1}{\alpha} \int_{U_a - 1}^{U_a - \rho_a} \frac{w_y}{u_y} \frac{e^\alpha - e^{\alpha(U_a - \rho_a - y)}}{e^\alpha - 1} dy + \frac{w_{U_a - 1}}{u_{U_a - 1}} \Omega_a \\
&\quad + (1 - \rho_a) \frac{\alpha}{e^\alpha - 1} \int_{U_a - 1}^{U_a} \frac{w_x}{u_x} e^{\alpha(U_a - x)} dx \\
&= \int_{U_a - 1}^{U_a - \rho_a} \frac{w_x}{u_x} \underbrace{\left( (1 - \rho_a) \frac{\alpha}{e^\alpha - 1} e^{\alpha(U_a - x)} + \frac{1}{\alpha} \frac{e^\alpha - e^{\alpha(U_a - \rho_a - x)}}{e^\alpha - 1} \right)}_{=\phi_x} dx \\
&\quad + \int_{U_a - \rho_a}^{U_a} \frac{w_x}{u_x} \underbrace{\left( 1 + (1 - \rho_a) \frac{\alpha}{e^\alpha - 1} e^{\alpha(U_a - x)} \right)}_{=\psi_x} dx + \frac{w_{U_a - 1}}{u_{U_a - 1}} \Omega_a.
\end{aligned}$$

672

□

673 Analogously to Display Ads, we define

$$\Phi_a := \int_{U_a-1}^{U_a-\rho_a} \phi_x dx \quad \text{and} \quad \Psi_a := \int_{U_a-\rho}^{U_a} \psi_x dx$$

674 and the total coefficient  $\tau_a := \Phi_a + \Psi_a + \Omega_a$  which by a calculation similar to Lemma 10 can be  
675 shown to be

$$\tau_a = 1 + \frac{1}{e^\alpha - 1} \frac{1}{\alpha} \left( e^\alpha - \frac{e^\alpha - 1}{\alpha} \right).$$

676 **Lemma 15.** *We have*

$$\text{PRD} \leq \max \left\{ \tau_a, \frac{\Psi_a}{\rho_a} \right\} \text{ALG}$$

677 *if  $\rho_a > 0$  and otherwise,*

$$\text{PRD} \leq \tau_a \text{ALG}.$$

678 *Proof.* Again, let

$$\bar{w}_\Phi := \frac{1}{1 - \rho_a} \int_{U_a-1}^{U_a-\rho_a} \frac{w_x}{u_x} dx$$

$$\bar{w}_\Psi := \frac{1}{\rho_a} \int_{U_a-\rho}^{U_a} \frac{w_x}{u_x} dx$$

679 be the average coefficients on the intervals  $[U_a - 1, U_a - \rho_a]$  and  $[U_a - \rho_a, U_a]$ , respectively. The  
680 latter coefficients are still decreasing as

$$\psi_x = 1 + \underbrace{(1 - \rho_a) \frac{\alpha}{e^\alpha - 1}}_{\geq 0} e^{\alpha(U_a - x)}$$

681 so we can bound the linear combination

$$\int_{U_a-\rho_a}^{U_a} \frac{w_x}{u_x} \psi_x dx \leq \bar{w}_\Psi \int_{U_a-\rho}^{U_a} \psi_x dx = \bar{w}_\Psi \Psi_a.$$

682 However,  $\phi_x$  is not always decreasing which can be seen by rearranging

$$\begin{aligned} \phi_x &= (1 - \rho_a) \frac{\alpha}{e^\alpha - 1} e^{\alpha(U_a - x)} + \frac{1}{\alpha} \frac{e^\alpha - e^{\alpha(U_a - \rho_a - x)}}{e^\alpha - 1} \\ &= \frac{1}{e^\alpha - 1} \left( (1 - \rho_a) \alpha - \frac{1}{\alpha} e^{-\alpha \rho_a} \right) e^{\alpha(U_a - x)} + \frac{1}{\alpha} \frac{1}{e^\alpha - 1} e^\alpha \end{aligned}$$

683 We observe that  $\phi_x$  is decreasing if  $(1 - \rho_a) \alpha$  is at least  $\frac{1}{\alpha} e^{-\alpha \rho_a}$ , and we analyze two cases based  
684 on the relationship of both terms:

685 •  $(1 - \rho_a) \alpha \geq \frac{1}{\alpha} e^{-\alpha \rho_a}$ : We have  $\int_{U_a-1}^{U_a-\rho_a} \frac{w_x}{u_x} \phi_x dx \leq \bar{w}_\Phi \Phi_a$  and thus

$$\begin{aligned} & \int_{U_a-1}^{U_a-\rho_a} \frac{w_x}{u_x} \phi_x dx + \int_{U_a-\rho}^{U_a} \frac{w_x}{u_x} \psi_x dx + \frac{w_{U_a-1}}{u_{U_a-1}} \Omega_a \\ & \leq \bar{w}_\Phi \Phi_a + \bar{w}_\Psi \Psi_a + w_{a, I_a - B_a} \Omega_a \\ & \leq \bar{w}_\Phi (\Phi_a + \Omega_a) + \bar{w}_\Psi \Psi_a \\ & = \bar{w}_\Phi (1 - \rho_a) \tau_a + \bar{w}_\Phi (\Phi_a + \Omega_a - (1 - \rho_a) \tau_a) + \bar{w}_\Psi \Psi_a \\ & = \int_{U_a-1}^{U_a-\rho_a} \frac{w_x}{u_s} \tau_a dx + \bar{w}_\Phi (\Phi_a + \Omega_a - (1 - \rho_a) \tau_a) + \bar{w}_\Psi \Psi_a \end{aligned} \tag{16}$$

686 •  $(1 - \rho_a) \alpha \leq \frac{1}{\alpha} e^{-\alpha \rho_a}$ : We can still show that  $\phi_x \leq \tau_a$  as



$$\begin{aligned}\phi_x &= (1 - \rho_a) \frac{\alpha}{e^\alpha - 1} e^{\alpha(U_a - x)} + \frac{1}{\alpha} \frac{e^\alpha - e^{\alpha(U_a - \rho_a - x)}}{e^\alpha - 1} \\ &\leq 1 + \frac{1}{e^\alpha - 1} \frac{1}{\alpha} \left( e^\alpha - \frac{e^\alpha - 1}{\alpha} \right) = \tau_a\end{aligned}$$

687

$$\Leftrightarrow \underbrace{\left( (1 - \rho_a) \alpha - \frac{1}{\alpha} e^{-\alpha \rho_a} \right)}_{\leq 0} \underbrace{e^{\alpha(U_a - x)}}_{\geq 0} \leq e^\alpha - 1 - \frac{1}{\alpha} \frac{e^\alpha - 1}{\alpha} = \underbrace{\left( 1 - \frac{1}{\alpha^2} \right)}_{\geq 0} \underbrace{(e^\alpha - 1)}_{\geq 0}.$$

688

Therefore,

$$\begin{aligned}& \int_{U_a - 1}^{U_a - \rho_a} \frac{w_x}{u_x} \phi_x dx + \int_{U_a - \rho}^{U_a} \frac{w_x}{u_x} \psi_x dx + \frac{w_{U_a - 1}}{u_{U_a - 1}} \Omega_a \\ & \leq \int_{U_a - 1}^{U_a - \rho_a} \frac{w_x}{u_x} \phi_x dx + \bar{w}_\Psi \Psi_a + \frac{w_{U_a - 1}}{u_{U_a - 1}} \Omega_a \\ & = \int_{U_a - 1}^{U_a - \rho_a} \frac{w_x}{u_x} \tau_a dx - \int_{U_a - 1}^{U_a - \rho_a} \frac{w_x}{u_x} (\tau_a - \phi_x) dx + \bar{w}_\Psi \Psi_a + \frac{w_{U_a - 1}}{u_{U_a - 1}} \Omega_a \\ & \leq \int_{U_a - 1}^{U_a - \rho_a} \frac{w_x}{u_x} \tau_a dx - \int_{U_a - 1}^{U_a - \rho_a} \frac{w_{U_a - 1}}{u_{U_a - 1}} (\tau_a - \phi_x) dx + \bar{w}_\Psi \Psi_a + \frac{w_{U_a - 1}}{u_{U_a - 1}} \Omega_a \\ & = \int_{U_a - 1}^{U_a - \rho_a} \frac{w_x}{u_x} \tau_a dx + \frac{w_{U_a - 1}}{u_{U_a - 1}} (\Phi_a + \Omega_a - (1 - \rho_a) \tau_a) + \bar{w}_\Psi \Psi_a\end{aligned}\quad (17)$$

689 In both cases (16) and (17), we have shown that

$$\begin{aligned}& \int_{U_a - 1}^{U_a - \rho_a} \frac{w_x}{u_x} \phi_x dx + \int_{U_a - \rho}^{U_a} \frac{w_x}{u_x} \psi_x dx + \frac{w_{U_a - 1}}{u_{U_a - 1}} \Omega_a \\ & \leq \int_{U_a - 1}^{U_a - \rho_a} \frac{w_x}{u_x} \tau_a dx + v (\Phi_a + \Omega_a - (1 - \rho_a) \tau_a) + \bar{w}_\Psi \Psi_a\end{aligned}$$

690 for a  $v \leq \bar{w}_\Phi$ .

$$\begin{aligned}& \int_{U_a - 1}^{U_a - \rho_a} \frac{w_x}{u_x} \tau_a dx + v (\Phi_a + \Omega_a - (1 - \rho_a) \tau_a) + \bar{w}_\Psi \Psi_a \\ & \leq \int_{U_a - 1}^{U_a - \rho_a} \frac{w_x}{u_x} \tau_a dx + \bar{w}_\Psi \max \{ \Phi_a + \Omega_a - (1 - \rho_a) \tau_a, 0 \} + \bar{w}_\Psi \Psi_a \\ & = \int_{U_a - 1}^{U_a - \rho_a} \frac{w_x}{u_x} \tau_a dx + \bar{w}_\Psi \max \{ \Phi_a + \Psi_a + \Omega_a - (1 - \rho_a) \tau_a, \Psi_a \} \\ & = \int_{U_a - 1}^{U_a - \rho_a} \frac{w_x}{u_x} \tau_a dx + \bar{w}_\Psi \max \{ \rho_a \tau_a, \Psi_a \} \\ & \leq \tau_a \int_{U_a - 1}^{U_a - \rho_a} \frac{w_x}{u_x} dx + \max \left\{ \tau_a, \frac{\Psi_a}{\rho_a} \right\} \int_{U_a - \rho_a}^{U_a} \frac{w_x}{u_x} dx \\ & \leq \max \left\{ \tau_a, \frac{\Psi_a}{\rho_a} \right\} \int_{U_a - 1}^{U_a} \frac{w_x}{u_x} dx\end{aligned}$$

691 or  $\leq \tau_a \int_{U_a - 1}^{U_a} \frac{w_x}{u_x} dx$  if  $\rho_a = 0$  □

692 Note that for the bound of Lemma 11, we did not require that  $\ell_a$  is integral. We can thus apply

693 Lemma 11 to bound  $\max \left\{ \tau_a, \frac{\Psi_a}{\rho_a} \right\}$  and obtain the same result, which proves Theorem 13.

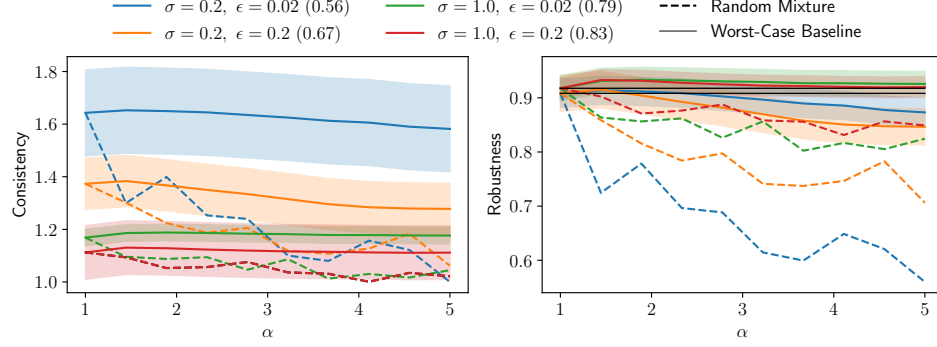

Figure 6: Experimental results for varying values of  $\alpha$  on synthetic data with 12 advertisers and 2000 impressions of 10 types, where we report the same quantities as in Figure 3. We use Dual Base predictions for different  $\sigma$  and  $\epsilon$ . Note that there are two black lines indicating the performance of the worst-case algorithm without predictions, corresponding to the datasets with differing  $\sigma$ .

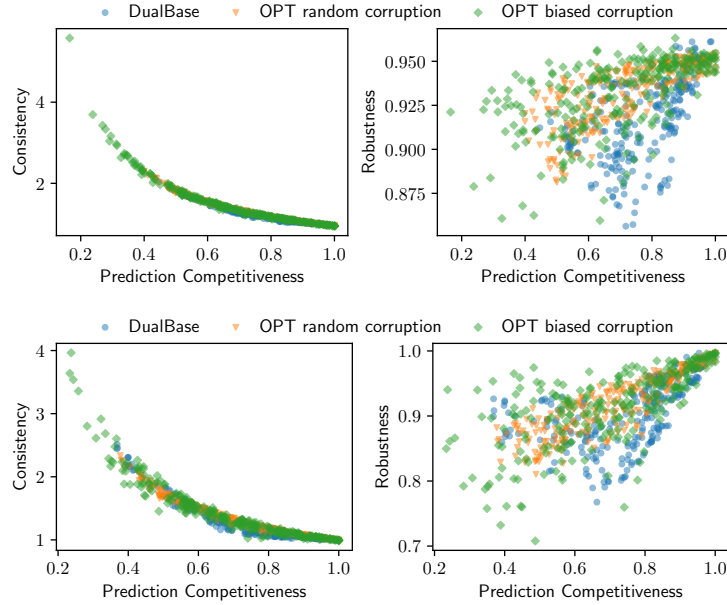

Figure 7: Performance for varying prediction quality with the data from Figure 6 (top) for  $\alpha = 2$  (top) and  $\alpha = 5$  (bottom).

## 694 C Further Experimental Results

### 695 C.1 Real-World Data

696 **Description of the Yahoo Dataset:** The original dataset contains impression allocations to 16268  
697 advertisers throughout 123 days, each tagged with the advertiser that bought the impression and a set  
698 of keyphrases that categorize the user for whom the impression is displayed. Lavastida et al. (2021)  
699 then consider the 20 most common keyphrases and create an impression type for each non-empty  
700 subset thereof. Whenever an advertiser buys an impression with a certain set of keyphrases, we  
701 assume that all impression types that correspond to a superset of these keyphrases are relevant for  
702 this advertiser, and that it derives some constant value (say, 1) from this allocation. At the same time,  
703 the number of impressions we create from each impression type (i.e. the supply) is the number of  
704 impression allocations in the original dataset that show that the impression type is relevant for an  
705 advertiser. As such, we obtain around 2 million impressions. Lavastida et al. (2021) try multiple

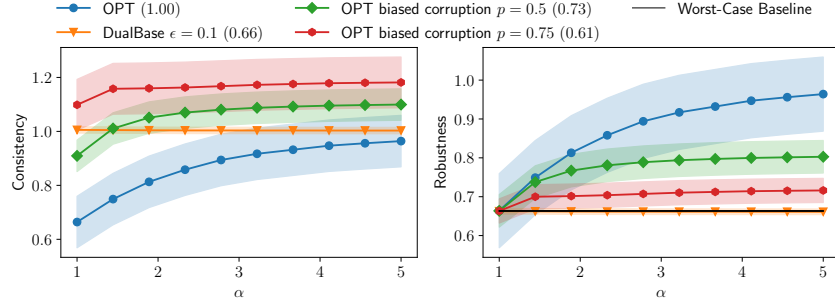

Figure 8: Performance on a worst-case instance with different predictors.

impression orders and budgets for the advertisers, but due to space constraints we restrict ourselves to display all impressions of a type at once, in supply-ascending order. We determine advertisers' budgets by allocating each impression to one of the advertisers with non-zero valuation uniformly at random and taking the number of allocated impressions at the end to be the advertiser's budget.

## C.2 Synthetic Data

**Results:** Figure 5 shows consistency and robustness of our algorithm on synthetic data on  $T = 2000$  impressions of 10 types and  $k = 12$  advertisers, for a variation of predictions. The plot shows the performance for predictions from the optimum solutions (with varying corruption) and the dual base prediction. Our algorithm converges to almost perfect consistency and robustness for  $\alpha = 10$ , given the optimum solution. At the same time, we observe that the algorithm is robust against both random and biased corruption, as the robustness does not drop to the prediction's low competitiveness of around 0.7. Furthermore, the algorithm performs well in combination with the dual base prediction for  $\epsilon = 0.1$  even though the first 200 impressions are clearly not representative of all synthetically generated impressions.

To investigate the our algorithm in conjunction with an easily available prediction, we also analyze the behavior of the dual base algorithm for different values of  $\sigma$  and  $\epsilon$  in Figure 6. The performance of our algorithm under dual base predictions clearly improves for increasing values of  $\sigma$  as impressions become more evenly distributed across the day. Generally, sampling more impressions helps but dual base predictions may also lead to a drop in robustness, and more samples can even lead to a more adversarial prediction, as we explore further below. Yet, the robustness does still stays above the prediction's competitiveness in these cases.

Figure 7 shows consistency and robustness for different predictions with varying competitiveness on  $\alpha \in \{2, 5\}$ . We achieve this by varying the fraction  $\epsilon \in [0, 1]$  of samples for the dual base algorithm and the corruption rate  $p \in [0, 1]$  for random and biased corruptions. For  $\alpha = 2$ , the consistency exceeds 1 if the prediction is not very good (competitiveness below 0.9). The algorithm is not heavily influenced by a bad prediction since  $\alpha = 2$  is low, so the total obtained value remains relatively constant. For  $\alpha = 5$ , the algorithm might however follow the bad choices of the prediction, so the competitiveness varies more. As expected, the average robustness decreases for increasing  $\alpha$ , but the dual base prediction starts out with a much lower robustness than the corrupted predictions. The reason for that is that both the dual base algorithm and exponential averaging make their decisions based on the discounted gain. Our algorithm might therefore easily disregard a corrupted prediction as its discounted gain is low (or even negative), but the dual base prediction looks like a sensible choice. The dual base algorithm therefore manages to fool the algorithm for low  $\alpha$ , while a biased corruption leads to the worst corruption for larger values of  $\alpha$ .

**Hard Instances:** We consider the worst-case instance for the Display Ads problem described in Mehta et al. (2007). For  $k$  advertisers, we create impressions of types  $r \in \{1, \dots, k\}$ . An impression  $t$  of type  $r$  has zero value for the first  $r - 1$  advertisers  $w_{1,t} = \dots = w_{r-1,t} = 0$  and value 1 for the following advertisers  $w_{r,t} = \dots = w_{k,t} = 1$ . We first show all impressions of type 1, then all impressions of type 2, and so forth. The instance is difficult as the algorithm—not knowing about future impressions—has to allocate impressions of a type equally among advertisers that can

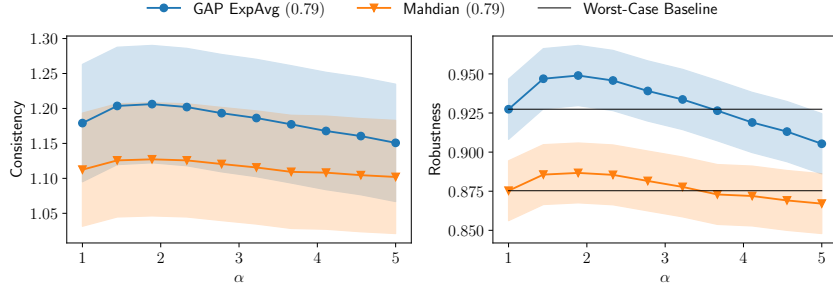

Figure 9: Performance on synthetic Ad Words instances, compared to the algorithm of Mehta et al. (2007). The black lines show the robustness of two worst-case algorithms without predictions: The algorithm due to Feldman et al. (2009a) which is the basis for our algorithm, and the algorithm of Mehta et al. (2007), which serves as a basis for the algorithm of Mahdian et al. (2007).

746 derive value from this impression type. As shown by Mehta et al. (2007), the competitiveness of the  
 747 exponential averaging algorithm reaches  $1 - \frac{1}{e}$  for  $k \rightarrow \infty$  on this instance.

748 We evaluate the performance of our algorithm on this worst-case instance in Figure 8. Providing the  
 749 optimum solution as prediction allows the algorithm to quickly ascend to a perfect robustness of 1.  
 750 We also consider two (biased) corrupted versions of this prediction with  $p \in \{50\%, 75\%\}$ . In both  
 751 cases, the algorithm still achieves a robustness above the competitiveness of the prediction. The dual  
 752 base algorithm cannot deliver meaningful predictions as it only sees impressions of the first type,  
 753 which are clearly not representative of the following impressions by construction.

### 754 C.3 Evaluation of GAP on an Ad Words Instance

755 With an algorithm for GAP, we can also solve AdWords instances. This allows us to compare our  
 756 generalized algorithm to the algorithm of Mahdian et al. (2007) under the same predictions. In Figure  
 757 9, we run both algorithms on synthetic instances from Section C.2 with an optimum prediction and  
 758 random corruption ( $p = 0.5$ ). Both algorithms seem to have similar consistency, but our algorithm  
 759 achieves a better robustness, due to a different choice of constants in the underlying algorithms.
